# Supplementary material for: Iterative delivery of an implementation support package to increase and sustain the routine provision of antenatal care addressing alcohol consumption during pregnancy: study protocol for a stepped-wedge cluster trial
Source: HighWire-hosted journal article supplement (doi:10.1136/bmjopen-2022-063486), 2022-07-01
Supplement: bmjopen-2022-063486supp003_data_supplement.pdf [file bmjopen-2022-063486supp003_data_supplement.pdf]

**Additional File 3.** Development of strategies to sustain the rate of care over time

| Factor potentially impacting sustainability                                                                                                                                             | Sustainability strategy                   | Description                                                                                                                                                                                                                                                                                                                                                                                                                                                                                                                                                                                                                                                                                                                                                                               |
|-----------------------------------------------------------------------------------------------------------------------------------------------------------------------------------------|-------------------------------------------|-------------------------------------------------------------------------------------------------------------------------------------------------------------------------------------------------------------------------------------------------------------------------------------------------------------------------------------------------------------------------------------------------------------------------------------------------------------------------------------------------------------------------------------------------------------------------------------------------------------------------------------------------------------------------------------------------------------------------------------------------------------------------------------------|
| The roles and responsibilities of maternity services and support agencies in ensuring the ongoing availability and usage of the implementation strategies had not been formally defined | Develop a formal implementation blueprint | <ul style="list-style-type: none"> <li>• A formal implementation blueprint that plans for sustainability will be developed and agreed to by maternity service leads in consultation with the supporting agency (Population Health Unit within the same Local Health District as the maternity services).</li> <li>• The plan will define the roles and responsibilities of maternity services in the continued provision of the model of care as part of routine practice.</li> <li>• The plan will define the roles and responsibilities of key maternity service groups/positions (maternity leadership, administrative staff, CME's) and the supporting agency in ensuring the ongoing availability, use and maintenance of the strategies implemented to support practice.</li> </ul> |
| No process to review the fit of the model of care within current maternity service context and to audit the availability, usage and maintenance of the implementation strategies        | Purposely re-examine the implementation   | <ul style="list-style-type: none"> <li>• A process for reviewing the formal implementation blueprint will be developed and agreed to by maternity service leads in consultation with the supporting agency.</li> <li>• The review will provide a mechanism to identify whether adaptations to the model of care and strategies supporting practice need to be made.</li> <li>• The first review will occur six months after the commencement of the intervention in each maternity service.</li> </ul>                                                                                                                                                                                                                                                                                    |
| High staff turnover in maternity services                                                                                                                                               | Conduct ongoing training                  | <ul style="list-style-type: none"> <li>• Existing CME's in each of the services will receive support and resources to schedule and conduct orientation training for new staff and top-up training for existing staff.</li> </ul>                                                                                                                                                                                                                                                                                                                                                                                                                                                                                                                                                          |
